# Supplementary material
Source: publisher figshare collection journal article supplement (https://acs.figshare.com/ndownloader/files/5177329)
Supplement: Supplementary file 1 [file 5177329]

# Formation of Enamides via Palladium(II)-Catalyzed Vinyl Transfer from Vinyl Ethers to Nitrogen Nucleophiles

Jodie L. Brice, James E. Meerdink, and Shannon S. Stahl\*

*University of Wisconsin – Madison*

*1101 University Ave.*

*Madison, WI 53706*

Email: stahl@chem.wisc.edu

Supporting Information

## General Considerations.

All commercially available compounds were used as received, and all were purchased from Aldrich except DIPHOS and  $\text{Pd}(\text{OCOCF}_3)_2$  (Strem),  $\text{Pd}(\text{OAc})_2$  and  $\text{PdCl}_2$  (DuPont),  $\text{HgSO}_4$  (Mallinckrodt Chemical Works), and  $\text{HgCl}_2$  (Allied Chemical).

$^1\text{H}$ ,  $^{13}\text{C}$ , and  $^{19}\text{F}$  NMR spectra were recorded on Bruker AC-300 MHz spectrometers, and  $\text{CDCl}_3$  was purchased from Cambridge Isotope Laboratories, Inc. The chemical shifts ( $\delta$ ) are given in parts per million relative to internal TMS (0 ppm for  $^1\text{H}$ ),  $\text{CDCl}_3$  (77.2 ppm for  $^{13}\text{C}$ ), and internal (capillary)  $\text{CF}_3\text{CO}_2\text{H}$  (-76.5 ppm for  $^{19}\text{F}$ ).

Flash chromatography was performed on silica gel 60 (particle size 0.040-0.063mm, 230-400 mesh ASTM, purchased from EMD) with hexanes/diethyl ether or methylene chloride.

$(\text{DPP})\text{Pd}(\text{OCOCF}_3)_2$  was prepared by a literature procedure,<sup>1</sup> and  $(\text{DPP})\text{Pd}(\text{OAc})_2$ ,  $(\text{Phen})\text{Pd}(\text{OCOCF}_3)_2$ ,  $(\text{TMEDA})\text{Pd}(\text{OCOCF}_3)_2$ ,  $(\text{PPh}_3)_2\text{Pd}(\text{OCOCF}_3)_2$ , and  $(\text{DIPHOS})\text{Pd}(\text{OCOCF}_3)_2$  were prepared analogously.  $(\text{DPP})\text{PdCl}_2$  was prepared by a known method.<sup>2</sup>

### General procedure for catalyst screening.

To a disposable culture tube were added 2-oxazolidinone (0.19 mmol, 16.8 mg), catalyst (9.5  $\mu$ mol), and 1,3,5-tri-*tert*-butylbenzene (0.063 mmol, 15.8 mg) internal standard. The reaction was started by adding butyl vinyl ether (BVE) (1.93 mmol, 250  $\mu$ L) and immediately heating to 75  $^{\circ}$ C. The culture tube was left open to air, and the contents were vortexed for 3 minutes. The reactions were halted by removing BVE under vacuum and cooling to  $-78^{\circ}$ C within 45 seconds. Product yield was evaluated by  $^1$ H NMR spectroscopy relative to internal standard.

### Synthesis of N-tosyl-N-vinyl- $\beta$ -alanine methyl ester.

The amine functionality of  $\beta$ -alanine was tosylated with TsCl according to literature procedure, 48%.<sup>3</sup> Subsequent methylation<sup>4</sup> to the ester by TMS-CHN<sub>2</sub> furnished quantitative yield of this substrate for transfer vinylation. Characterization data agrees with literature.<sup>5</sup>

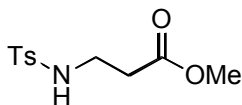

### Representative procedure for transfer vinylation.

2-Oxazolidinone (5.7 mmol, 500 mg), BVE (57.4 mmol, 7.43 mL), and (DPP)Pd(OCOCF<sub>3</sub>)<sub>2</sub> (0.28 mmol, 189 mg) were combined in a round bottom flask equipped with a magnetic stir bar. The flask was capped by a rubber septum with an 18 gauge needle punctured through it. The reaction was stirred at 75  $^{\circ}$ C in an oil bath and monitored for completion by  $^1$ H NMR aliquots. Upon completion, the reaction mixture was allowed to cool and loaded directly onto a chromatography column packed with silica (elution solvent = hexanes/ether 1:9).

### Product Characterization Data.

**3-vinyl-2-oxazolidinone.** 91%, light yellow oil. Characterization data matches literature report.<sup>6</sup>

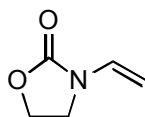

**(S)-4-isopropyl-3-vinyl-2-oxazolidinone.** Column chromatography (hexanes/ether 25:75) yielded a off-white solid, 95%.  $^1\text{H}$  NMR (300 MHz,  $\text{CDCl}_3$ )  $\delta$  6.78 (dd,  $J$  = 16.2, 9.3 Hz, 1H),  $\delta$  4.49-4.08 (m, 4H),  $\delta$  4.05 (dt,  $J$  = 4.8, 3.6 Hz, 1H),  $\delta$  2.45 (septet d,  $J$  = 6.9, 3.3 Hz, 1H),  $\delta$  0.94 (d,  $J$  = 6.9 Hz, 3H),  $\delta$  0.85 (d,  $J$  = 6.6 Hz, 3H).  $^{13}\text{C}\{^1\text{H}\}$  NMR (75 MHz,  $\text{CDCl}_3$ )  $\delta$  155.8, 129.0, 94.2, 63.1, 58.1, 26.0, 18.0, 14.0. HRMS:  $m/z$  (EI) calculated  $[\text{M}]^{*+} = 155.0946$ , measured 155.0942.  $[\alpha]_{\text{D}}^{25} = +51.5$  ( $c = 1.1$ ,  $\text{CH}_2\text{Cl}_2$ ).

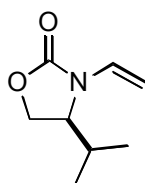

**(S)-4-benzyl-3-vinyl-2-oxazolidinone.** Column chromatography (hexanes/ether 25:75) yielded a light yellow oil, 92%. Characterization data matches literature report.<sup>7</sup>

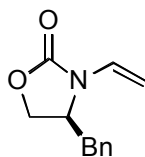

**1-Vinyl-2-pyrrolidinone.** Column chromatography (hexanes/ether 1:9) yielded a pale yellow oil, 89%.  $^1\text{H}$  NMR spectra matches known reports for commercially available compound.<sup>8</sup>

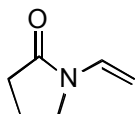

**N-methyl-N-vinyl-p-toluenesulfonamide.**<sup>9</sup> Column chromatography ( $\text{CH}_2\text{Cl}_2$ ) yielded a white crystalline solid, 64%.  $^1\text{H}$  NMR (300 MHz,  $\text{CDCl}_3$ )  $\delta$  7.64 (d,  $J$  = 6.75 Hz, 2H),  $\delta$  7.31 (d,  $J$  = 6.25 Hz, 2H),  $\delta$  7.00 (dd,  $J$  = 15.8, 9.0 Hz, 1H),  $\delta$  4.33 (d,  $J$  = 9.0 Hz, 1H),  $\delta$  4.18 (d,  $J$  = 15.5 Hz, 1H),  $\delta$  2.86 (s, 3H),  $\delta$  2.43 (s, 3H).  $^{13}\text{C}\{^1\text{H}\}$  NMR (75 MHz,  $\text{CDCl}_3$ )

$\delta$  143.6, 134.6, 129.6, 126.8, 92.9, 31.1, 21.3. HRMS:  $m/z$  (ESI) calculated  $[M+Na+MeOH]^+ = 266.0827$ , measured = 266.0835.

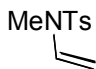

**N-tosyl-N-vinyl- $\beta$ -alanine methyl ester.** Column chromatography ( $CH_2Cl_2$ ) yielded a pale yellow viscous oil, 87%.  $^1H$  NMR (300 MHz,  $CDCl_3$ )  $\delta$  7.67 (d,  $J = 6.6$  Hz, 2H),  $\delta$  7.31 (d,  $J = 8.7$  Hz, 2H),  $\delta$  6.88 (dd,  $J = 15.9, 9.3$  Hz, 1H),  $\delta$  4.36 (d,  $J = 9.6$  Hz, 1H),  $\delta$  4.28 (d,  $J = 15.9$  Hz, 1H),  $\delta$  3.69 (s, 3H),  $\delta$  3.64 (m, 2H),  $\delta$  2.65 (m, 2H),  $\delta$  2.43 (s, 3H).  $^{13}C\{^1H\}$  NMR (75 MHz,  $CDCl_3$ )  $\delta$  171.6, 144.2, 136.0, 131.8, 130.0, 127.0, 92.9, 52.0, 40.4, 32.0, 21.7. HRMS:  $m/z$  (ESI) calculated  $[MNa]^+ = 306.0776$ , measured = 306.0763.

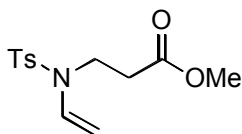

**N-vinyl-2,2,2-trifluoroacetamide.**<sup>10</sup> Due to difficulties encountered during purification of N-vinyl trifluoroacetamide, ethyl vinyl ether was used in place of butyl vinyl ether and the reaction was run at room temperature. Column chromatography ( $CH_2Cl_2$ ) yielded a white solid, 76%.  $^1H$  NMR (300 MHz,  $CDCl_3$ )  $\delta$  8.15 (br., 1H),  $\delta$  6.89 (ddd,  $J = 18.9, 15.6, 9.0$  Hz, 1H),  $\delta$  5.01 (d,  $J = 9.0$  Hz, 1H),  $\delta$  4.79 (d,  $J = 9.0$  Hz, 1H).  $^{13}C\{^1H\}$  NMR (75 MHz,  $CDCl_3$ )  $\delta$  155.0 (q,  $J = 38.2$  Hz),  $\delta$  126.4 (s),  $\delta$  115.8 (q,  $J = 287$  Hz),  $\delta$  102.0 (s).  $^{19}F$  NMR (282 MHz,  $CDCl_3$ )  $\delta$  74.7. HRMS:  $m/z$  (EI) calculated  $[M]^+ = 139.0245$ , measured = 139.0247.

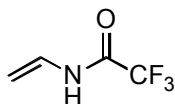

**Incompatibility of the described transfer vinylation conditions with the carboxylic acid functionality.**

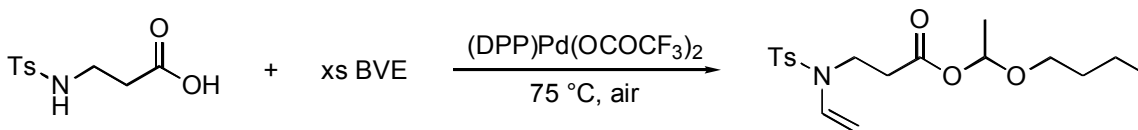

Column chromatography (CH<sub>2</sub>Cl<sub>2</sub>) yielded a pale yellow oil, 12%. <sup>1</sup>H NMR (300 MHz, CDCl<sub>3</sub>) δ 7.67 (d, J = 6.9 Hz, 2H), δ 7.31 (d, J = 7.8 Hz, 2H), δ 6.88 (dd, J = 16.2, 9.3 Hz, 1H), δ 5.91 (q, J = 5.4 Hz, 1H), δ 4.37 (d, J = 9.0 Hz, 1H), δ 4.28 (d, J = 15.6 Hz, 1H), δ 3.66-3.45 (m, 4H), δ 2.66 (t, J = 6.6 Hz, 2H), δ 2.43 (s, 3H), δ 1.55 (m, 2H), δ 1.39 (d, J = 5.1 Hz, 3H), δ 1.36 (m, 2H), δ 0.92 (t, J = 7.2 Hz, 3H). <sup>13</sup>C{<sup>1</sup>H} NMR (75 MHz, CDCl<sub>3</sub>) δ 170.5, 143.8, 135.6, 131.4, 129.7, 126.7, 96.8, 92.6, 68.9, 39.9, 31.9, 31.3, 21.3, 20.5, 18.9, 13.6. HRMS: m/z (ESI) calculated [MNa]<sup>+</sup> = 392.1508, measured = 392.1522.

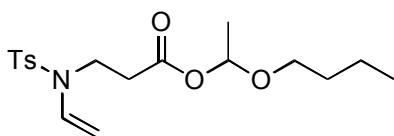

<sup>1</sup> McKeon, J. E.; Fitton, P. *Tetrahedron* **1972**, 28, 233-238.

<sup>2</sup> Kamath, S. S.; Uma, V.; Srivastava, T. S. *Inorg. Chim. Acta* **1989**, 161, 49-56.

<sup>3</sup> El-Sharief, A. M. Sh.; Ammar, Y. A.; Zahran, M. A.; Ali, A. H.; El-Gaby, M. S. A. *Molecules* **2001**, 6, 267-278.

<sup>4</sup> Giuliano, R. M.; Jordan, A. D., Jr.; Gauthier, A. D.; Hoogsteen, K. *J. Org. Chem.* **1993**, 58, 4979-4988.

<sup>5</sup> Pak, C. S.; Kim, T. H.; Ha, S. J. *J. Org. Chem.* **1998**, 63, 10006-10010.

<sup>6</sup> Gaulon, C.; Gizecki, P.; Dhal, R.; Dujardin, G. *Synlett* **2002**, 6, 952-956.

<sup>7</sup> Gaulon, C.; Dhal, R.; Dujardin, G. *Synthesis* **2003**, 14, 2269-2272.

<sup>8</sup> <http://www.sigmaaldrich.com>.

<sup>9</sup> Stacey, F. W.; Sauer, J. C.; McKusick, B. C. *J. Am. Chem. Soc.* **1959**, 81, 987-992.

<sup>10</sup> Brown, H. C.; Wetzel, C. R. *J. Org. Chem.* **1965**, 30, 3729-3733.

(S)-4-isopropyl-3-vinyl-2-oxazolidinone  
in CDCl<sub>3</sub>

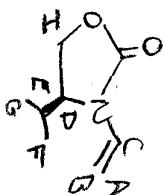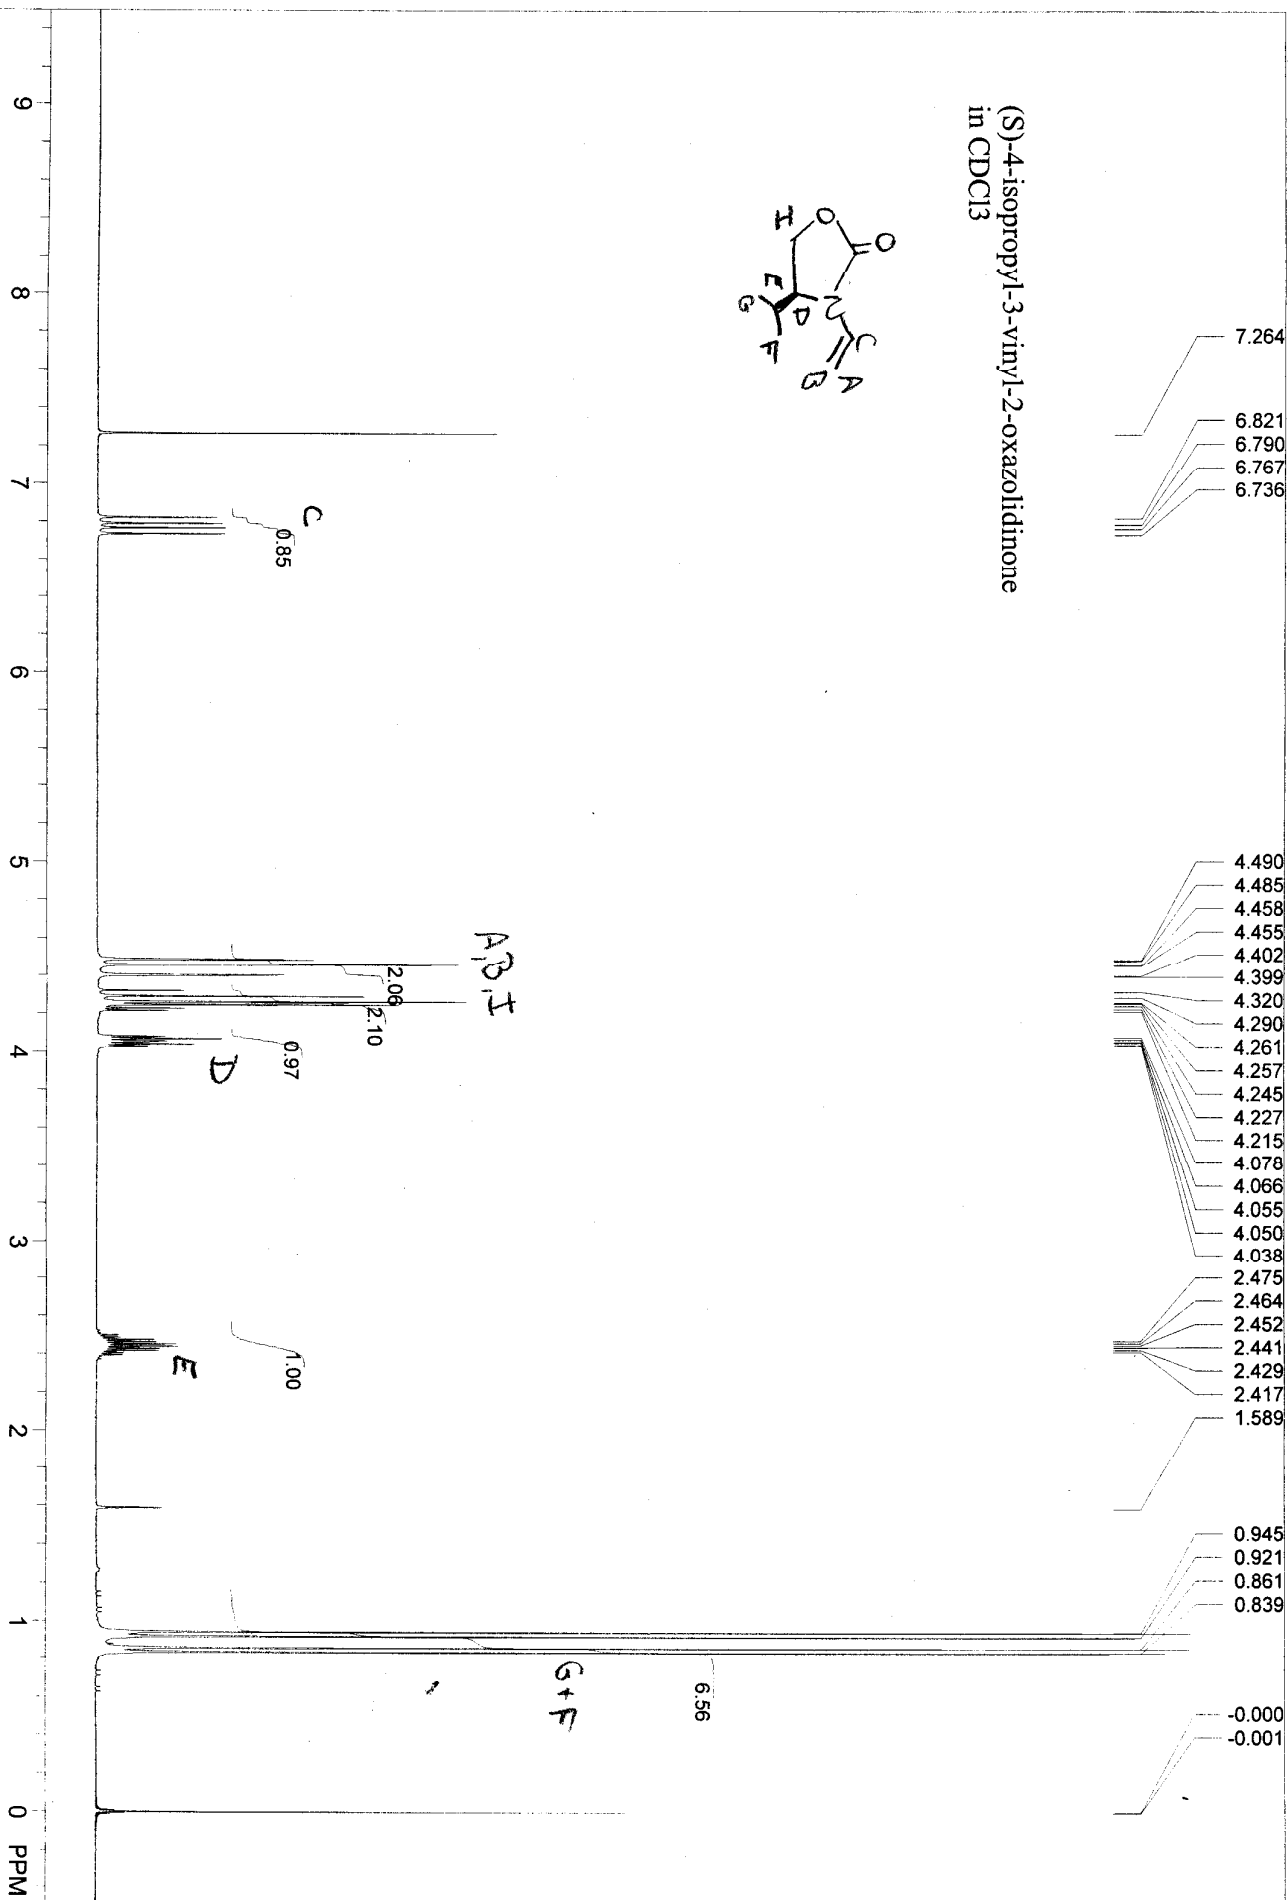

F1: 300.135 F2: 1.000 SW1: 6024 PD: 0.0 sec NA: 16 OF1: 1733.9 LB: 0.0  
 EX: PW: 3.0 usec  
 USER: -- DATE: 03/10/2004 PTSId: 32768 WinNuts - JB3060.001

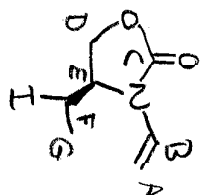vinyl 4-isopropyl 2-ox  
in CDCl3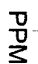

|              |              |             |             |              |                      |
|--------------|--------------|-------------|-------------|--------------|----------------------|
| F1: 75.475   | F2: 1.000    | SW1: 20833  | OF1: 8325.2 | PTSId: 65536 |                      |
| EX: DEPT AUR | PW: 4.0 usec | PD: 3.0 sec | NA: 512     | LB: 0.0      | WmNuts - JB3058E.003 |

USER: -- DATE: 03/09/2004

methylynylosylamide  
in CDCl<sub>3</sub>

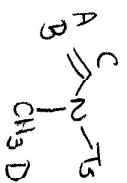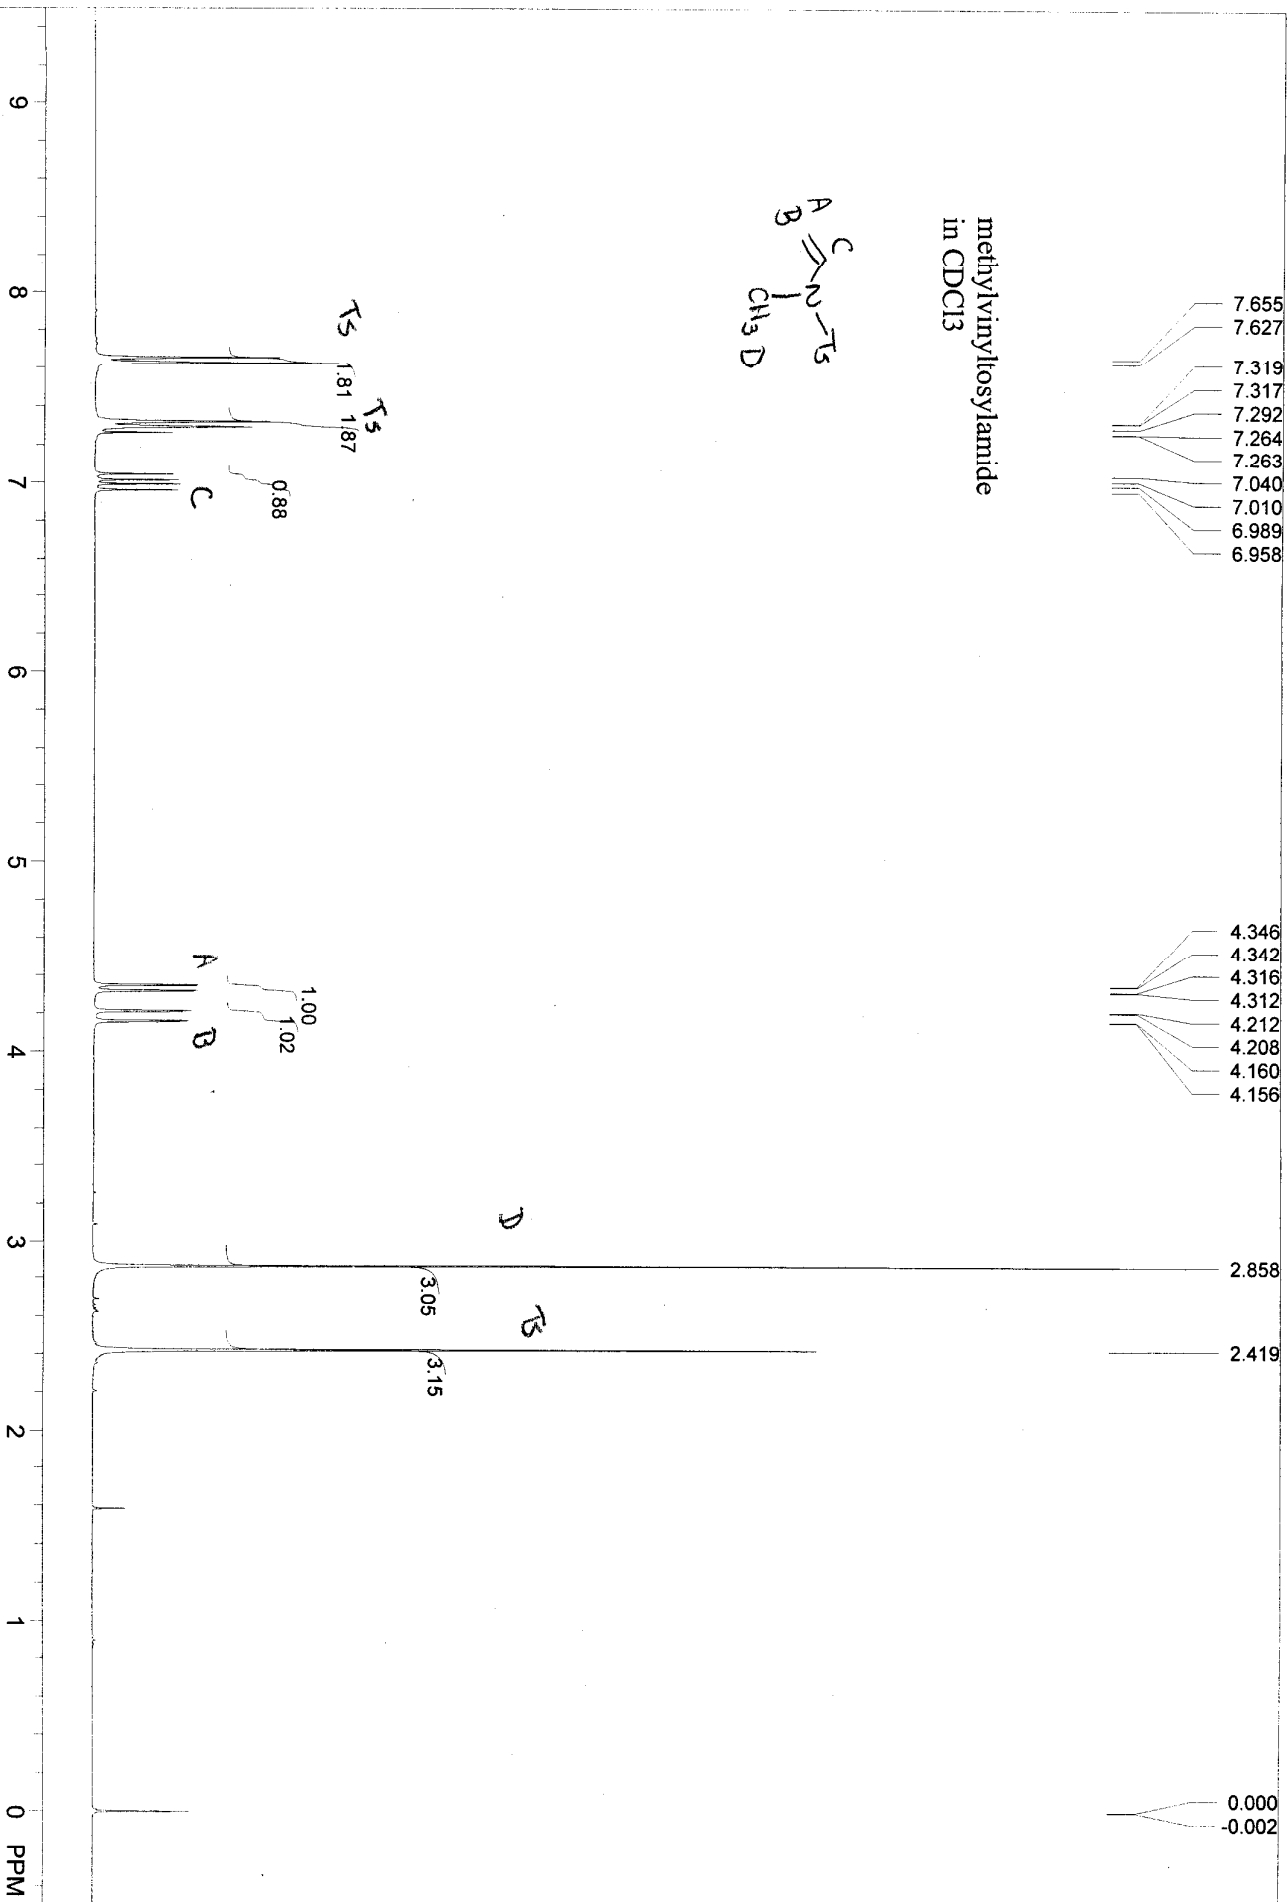

EX: F1: 300.135 F2: 1.000 SW1: 6024 PW: 3.0 usec PD: 0.0 sec NA: 16 OF1: 1733.4 LB: 0.0 PTS1d: 32768

USER: -- DATE: 03/10/2004

WinNuts - JB3060.002



PPM

JB3039.003

143.801  
134.834  
133.808  
129.597  
128.780

92.812  
77.433  
76.813  
76.568

31.057

21.324

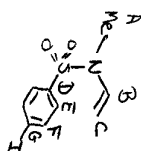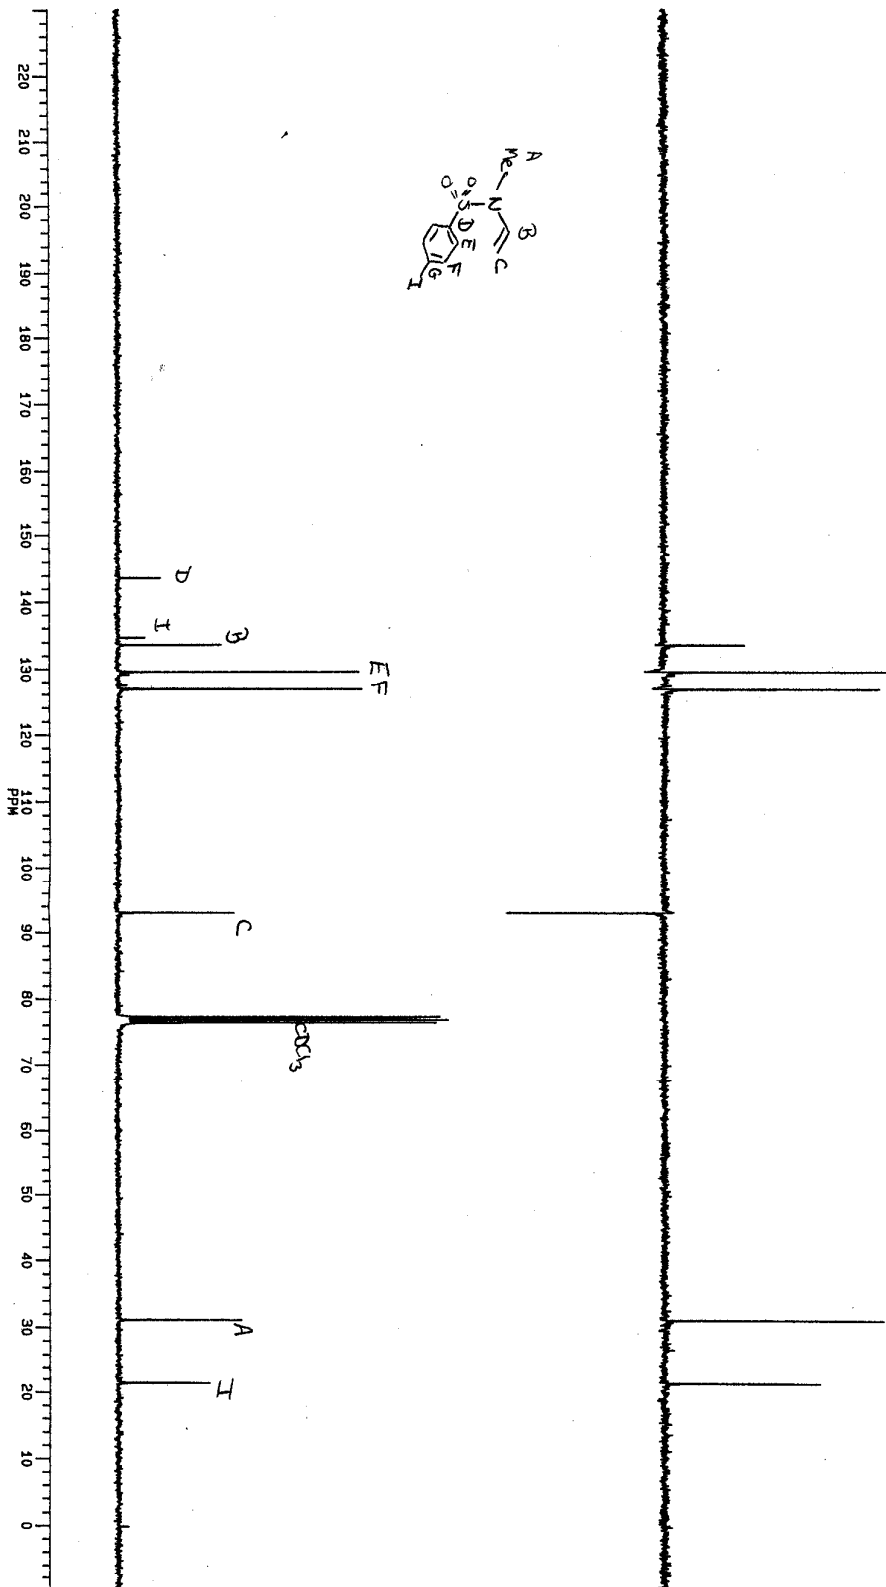

J13615.102  
 AU P106:  
 X02 AU  
 DATE 26-1-94  
 SE 75.403  
 ST 75.0  
 SI 75.381.066  
 TO 65536  
 SW 20833.333  
 HZ/PT .636  
 CM 0.0  
 RD 0.0  
 AR 320 1.573  
 NS 1024  
 TE 297  
 FX 25100  
 OF 483.000  
 DP 18H DO  
 LB 2.000  
 LB 88  
 CX 35.100  
 CX 35.00  
 F1 230.044P  
 F2 -9.982P  
 HZ/CM 517.055  
 PPM/CM 6.857  
 SR -5911.45

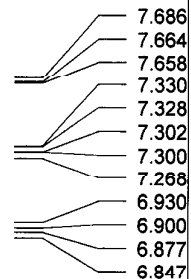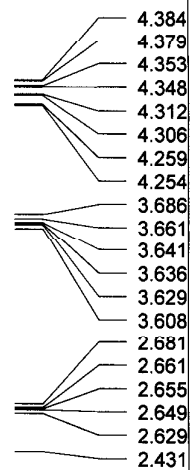

1.565

0.005

vinyl N-Ts-b-alanine methyl ester  
in CDCl3

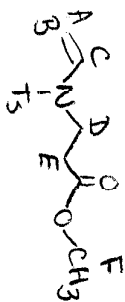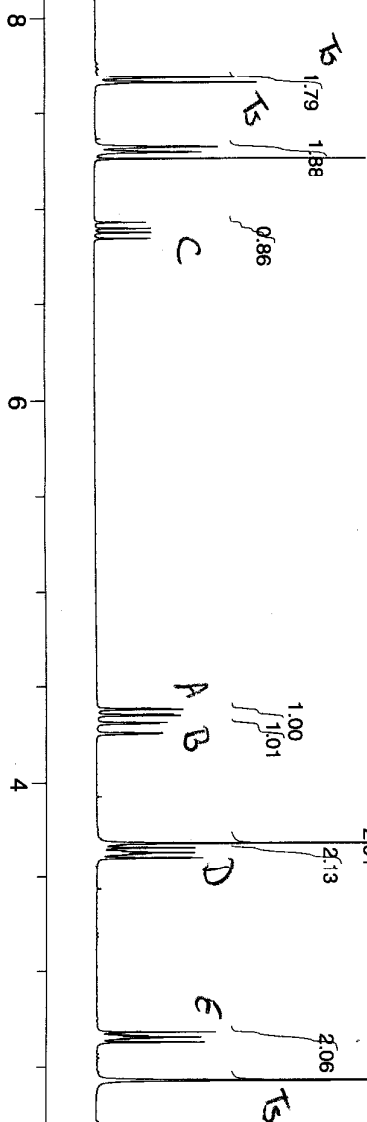

|             |           |              |             |             |        |         |              |                      |
|-------------|-----------|--------------|-------------|-------------|--------|---------|--------------|----------------------|
| F1: 300.135 | F2: 1.000 | SW1: 6024    | PD: 0.0 sec | OF1: 1734.9 | NA: 16 | LB: 0.0 | PTSId: 32768 | WinNuis - jh3058.007 |
| EX:         |           | PW: 3.0 usec |             |             |        |         |              |                      |

USER: -- DATE: 03/08/2004

vinyl tosyl|b-ala methyl| ester  
in CDCl<sub>3</sub>

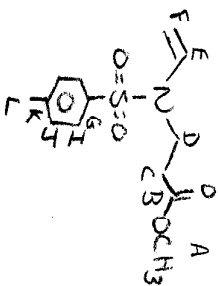

200

150

100

50

PPM

171.622

144.204

136.035

131.816

131.794

130.097

130.084

130.074

130.066

127.069

127.058

92.864

92.850

77.654

77.230

76.806

52.034

40.361

31.987

21.730

B

G

K

E

I

J

F

CDCl<sub>3</sub>

A

D

C

L

F1: 75.475

F2: 1.000

SW1: 20833

PW: 4.0 usec

PD: 3.0 sec

OF1: 8325.0

NA: 445

LB: 0.0

PTSID: 65536

USER: -- DATE: 03/09/2004

WinNuts - JB3058.008

vinyl trifluoroacetamide  
in CDCl<sub>3</sub>

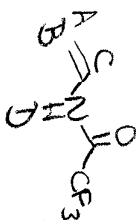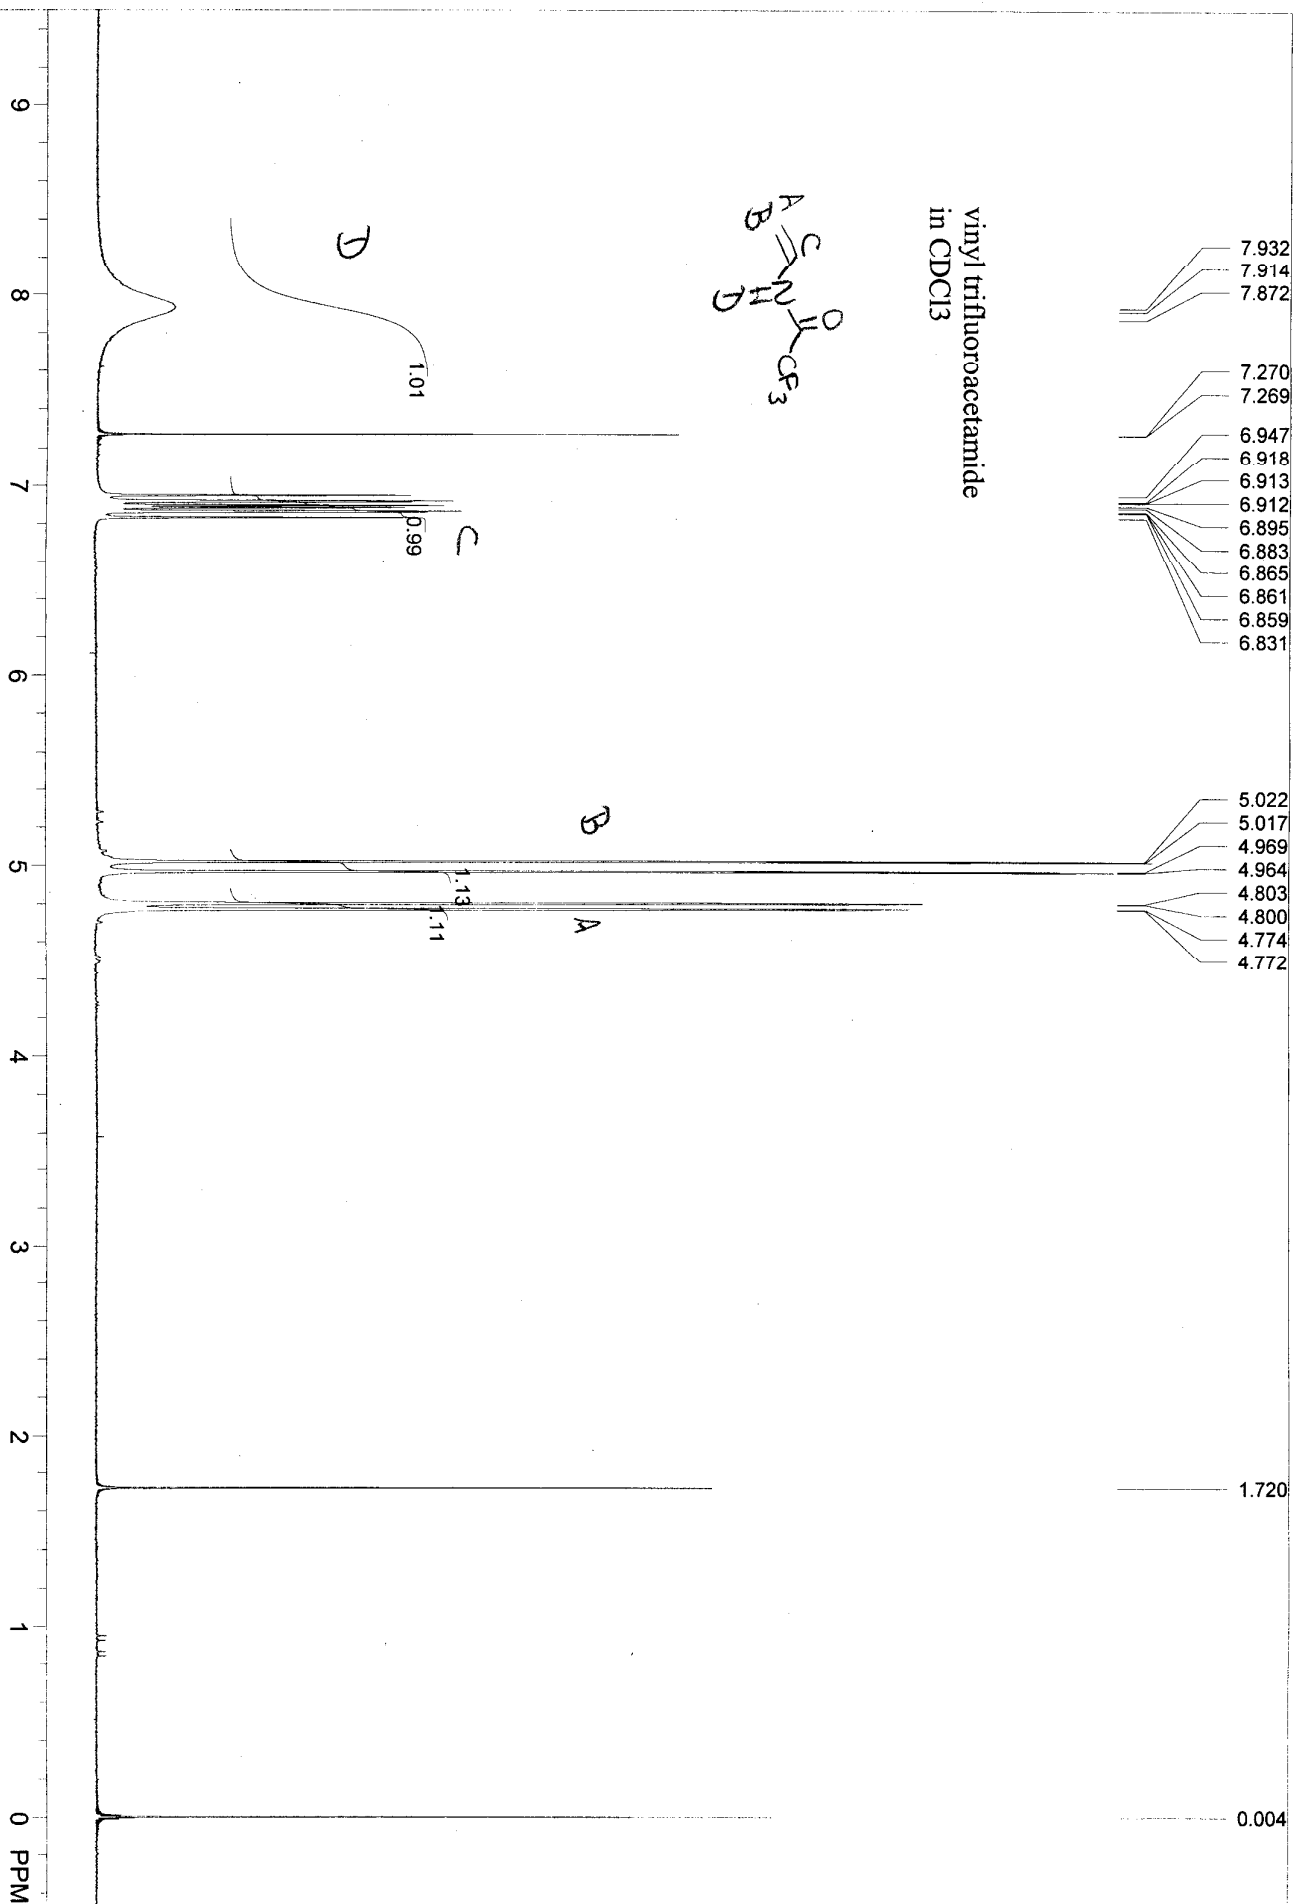

F1: 300.135 F2: 1.000 SW1: 6024 PW: 3.0 usec PD: 0.0 sec NA: 16 OF1: 1736.0 LB: 0.0  
 EX: PTSId: 32768 WinNuts - JB3060.004  
 USER: -- DATE: 03/11/2004

vinyl trifluoroacetamide  
in CDCl<sub>3</sub>

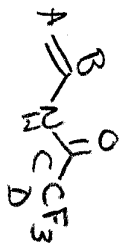

155.841  
155.335  
154.831  
154.320

126.467  
126.368  
121.517

117.715  
113.913  
110.108

102.050

77.657  
77.230  
76.807

200

150

100

50

PPM

C

B

A

D

CDCl<sub>3</sub>

|            |           |              |             |             |         |                        |
|------------|-----------|--------------|-------------|-------------|---------|------------------------|
| F1: 75.475 | F2: 1.000 | SW1: 20833   | PD: 3.0 sec | OF1: 8328.6 | LB: 0.0 | PTSlid: 65536          |
| EX: DEPT   | AUR       | PW: 4.0 usec |             | NA: 512     |         | WinNuts - \$JB3059.002 |

USER: -- DATE: 03/09/2004

vinyl trifluoroacetamide  
TFA std.  
in CDCl<sub>3</sub>

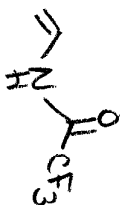

-60

-65

-70

-75

-80

-85

PPM

-74.732

-76.467

-76.490

-76.500

-76.515

TFA

0.77

1.00

|                |           |              |             |               |         |                      |
|----------------|-----------|--------------|-------------|---------------|---------|----------------------|
| F1: 282.128    | F2: 1.000 | SW1: 125002  | PD: 1.0 sec | OF1: -23481.9 | LB: 0.0 | PTSId: 65536         |
| EX: PRESATPCAU |           | PW: 4.0 usec |             | NA: 72        |         | WinNuts - JB3059.003 |

USER: -- DATE: 03/12/1994

transfer vinylation of  
N-Ts-b-alanine  
in CDCl<sub>3</sub>

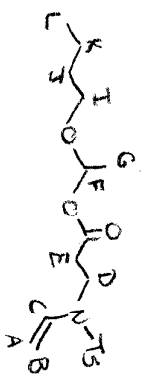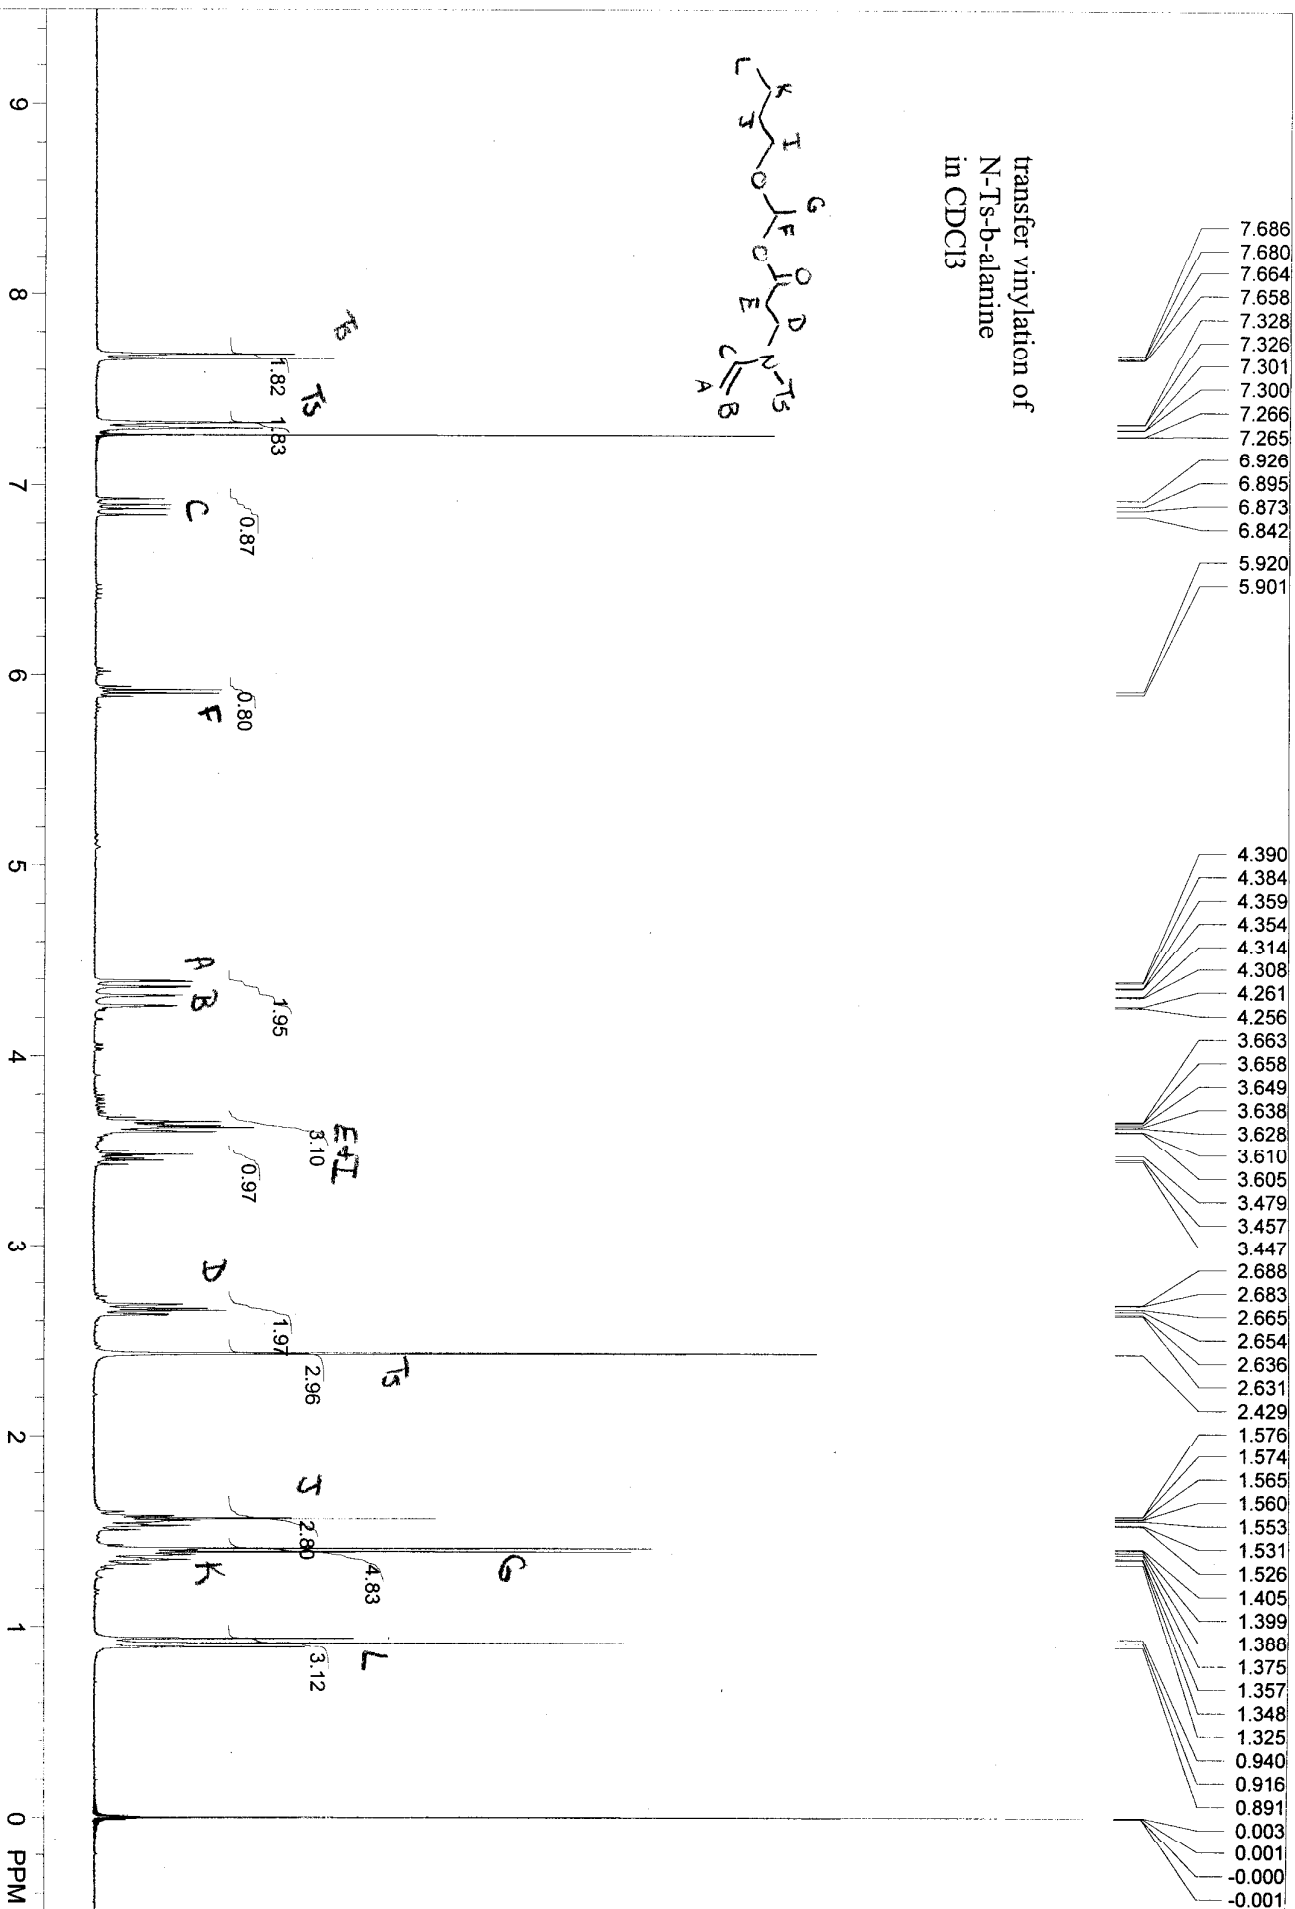

F1: 300.135 F2: 1.000 SW1: 6024 PW: 3.0 usec PD: 0.0 sec NA: 16 OF1: 1733.8 LB: 0.0 PTS1d: 32768

EX: WinNuts - jb3032.005

USER: -- DATE: 01/07/2004

transfer vinylation of  
N-Ts-b-alanine  
in CDCl<sub>3</sub>

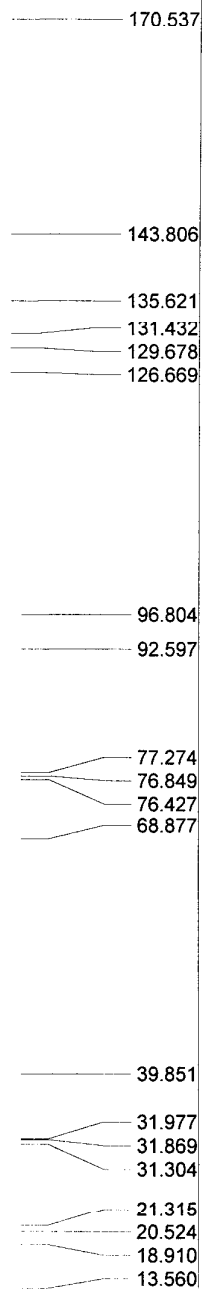

DEPT-135

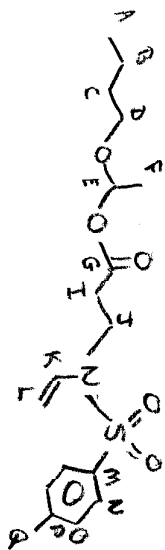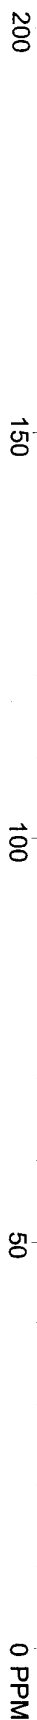

13C{1H}

JB3032.005  
F1: 75.409  
EX: X02 AU  
F2: 1.000  
SW1: 20833  
PW: 0.0 usec  
PD: 0.0 sec  
OF1: 8292.4  
NA: 712  
LB: 0.0  
PTS1d: 32768  
USER: -- DATE: 01/08/1994  
WinNuts - \$1A080S.103
